# Supplementary material for: Massive economic costs of biological invasions despite widespread knowledge gaps: a dual setback for India
Source: Springer Nature journal article supplement (doi:10.1007/s10530-022-02780-z), 2022-04-05
Supplement: MOESM1 [file 10530_2022_2780_MOESM1_ESM.xlsx]

## Sheet: Manuscript_Info
Title: Fragmented yet high economic costs of biological invasions in India
Authors: Alok Bang1,*, Ross N. Cuthbert2,3, Phillip J. Haubrock4,5, Romina D. Fernandez6, Desika Moodley7, Christophe Diagne8, Anna J. Turbelin8, David Renault9,10, Tatenda Dalu11, Franck Courchamp8
Affiliations:
1 Society for Ecology Evolution and Development, Wardha 442001, Maharashtra, India
2 GEOMAR Helmholtz-Zentrum für Ozeanforschung Kiel, 24105 Kiel, Germany
3 School of Biological Sciences, Queen’s University Belfast, BT9 5DL Belfast, United Kingdom
4 Senckenberg Research Institute and Natural History Museum Frankfurt, Department of River Ecology and Conservation, Gelnhausen, Germany
5 Faculty of Fisheries and Protection of Waters, South Bohemian Research Centre of Aquaculture and Biodiversity of Hydrocenoses, University of South Bohemia, Vodňany, Czech Republic
6 Instituto de Ecología Regional, CONICET-Universidad Nacional de Tucumán. CC 34, 4107, Yerba Buena, Tucumán, Argentina
7 Czech Academy of Sciences, Institute of Botany, Department of Invasion Ecology, CZ-252 43, Průhonice, Czech Republic
8 Université Paris-Saclay, CNRS, AgroParisTech, Ecologie Systématique Evolution, 91405, Orsay, France
9 University of Rennes, CNRS, ECOBIO [(Ecosystèmes, biodiversité, évolution)] - UMR 6553, F 35000 Rennes, France
10 Institut Universitaire de France, 1 rue Descartes, 75231 Paris Cedex 05, France
11 School of Biology and Environmental Sciences, University of Mpumalanga, Nelspruit 1200, South Africa
*Corresponding author: E-mail: alokbang@gmail.com

## Sheet: RawDataIndia
Impact_year	Cost_ID	Repository	Reference_ID	Authors	Language	Publication_year	Type_of_material	Previous_materials	Availability	Kingdom	Phylum	Class	Order	Family	Genus	Species	Common_name	Environment_IAS	Geographic_region	Official_country	State.Province.Administrative_area	Location	Spatial_scale	Period_of_estimation	Time_range	Probable_starting_year	Probable_ending_year	Probable_starting_year_adjusted	Probable_ending_year_adjusted	Occurrence	Raw_cost_estimate_local_currency	Min_Raw_cost_estimate_local_currency	Max_Raw_cost_estimate_local_currency	Raw_cost_estimate_2017_USD_exchange_rate	Raw_cost_estimate_2017_USD_PPP	Cost_estimate_per_year_local_currency	Cost_estimate_per_year_2017_USD_exchange_rate	Cost_estimate_per_year_2017_USD_PPP	Currency	Applicable_year	Type_of_applicable_year	Implementation	Acquisition_method	Impacted_sector	Type_of_cost	Type_of_cost_merged	Benefit_value.s.	Contributors	Island
2019	NewIndia_07	Go	Tamilnadu2020	Government of Tamilnadu	English	2020	Official report	NA	Yes	Animalia	Arthropoda	Insecta	Lepidoptera	Noctuidae	Spodoptera	Spodoptera frugiperda	Fall Armyworm	Terrestrial	Asia	India	Tamil Nadu		Unit (220000 Hectares; 293424 Farmers)	2018-2019	Year	2019	2019	2019	2019	Potentially ongoing	1862500000	NA	NA	2.61112e+07	9.86343e+07	1862500000	2.61112e+07	9.86343e+07	INR	2019	Effective	Observed	Report/Estimation	Agriculture	Damage-Loss	Damage_costs	no	Alok Bang	N
2020	NewIndia_08	Go	Tamilnadu2020	Government of Tamilnadu	English	2020	Official report	NA	Yes	Animalia	Arthropoda	Insecta	Lepidoptera	Noctuidae	Spodoptera	Spodoptera frugiperda	Fall Armyworm	Terrestrial	Asia	India	Tamil Nadu		Unit (119486 Hectares)	2019-2020	Year	2020	2020	2020	2020	Potentially ongoing	626629500	476600000	776659000	8.78499e+06	3.31851e+07	626629500	8.78499e+06	3.31851e+07	INR	2020	Effective	Observed	Report/Estimation	Authorities-Stakeholders	Control/Eradication	Management_costs	no	Alok Bang	N
1996	NewIndia_12	Go	Vincent2002	Vincent David & Quirke Derek	English	2002	Official report	NA	Yes	Plantae	Tracheophyta	Liliopsida	Poales	Poaceae	Phalaris	Phalaris minor	Small Canary Grass	Terrestrial	Asia	India	Punjab/ Haryana		Unit (2 States)	1995 - 1996	Year	1996	1996	1996	1996	One-time	132360	NA	NA	94769.1	#DIV/0!	132360	94769.1	#DIV/0!	AUD	2001	Effective	Observed	Report/Estimation	Authorities-Stakeholders	Funding/Research	Management_costs	no	Alok Bang/LBM	N
1997	NewIndia_13	Go	Vincent2002	Vincent David & Quirke Derek	English	2002	Official report	NA	Yes	Plantae	Tracheophyta	Liliopsida	Poales	Poaceae	Phalaris	Phalaris minor	Small Canary Grass	Terrestrial	Asia	India	Punjab/ Haryana		Unit (2 States)	1996-1997	Year	1997	1997	1997	1997	One-time	92360	NA	NA	66129.3	#DIV/0!	92360	66129.3	#DIV/0!	AUD	2001	Effective	Observed	Report/Estimation	Authorities-Stakeholders	Funding/Research	Management_costs	no	Alok Bang/LBM	N
1998	NewIndia_14	Go	Vincent2002	Vincent David & Quirke Derek	English	2002	Official report	NA	Yes	Plantae	Tracheophyta	Liliopsida	Poales	Poaceae	Phalaris	Phalaris minor	Small Canary Grass	Terrestrial	Asia	India	Punjab/ Haryana		Unit (2 States)	1997-1998	Year	1998	1998	1998	1998	One-time	322385	NA	NA	230826	#DIV/0!	322385	230826	#DIV/0!	AUD	2001	Effective	Observed	Report/Estimation	Authorities-Stakeholders	Funding/Research	Management_costs	no	Alok Bang/LBM	N
1999	NewIndia_15	Go	Vincent2002	Vincent David & Quirke Derek	English	2002	Official report	NA	Yes	Plantae	Tracheophyta	Liliopsida	Poales	Poaceae	Phalaris	Phalaris minor	Small Canary Grass	Terrestrial	Asia	India	Punjab/ Haryana		Unit (2 States)	1998-1999	Year	1999	1999	1999	1999	One-time	292684	NA	NA	209560	#DIV/0!	292684	209560	#DIV/0!	AUD	2001	Effective	Observed	Report/Estimation	Authorities-Stakeholders	Funding/Research	Management_costs	no	Alok Bang/LBM	N
2000	NewIndia_16	Go	Vincent2002	Vincent David & Quirke Derek	English	2002	Official report	NA	Yes	Plantae	Tracheophyta	Liliopsida	Poales	Poaceae	Phalaris	Phalaris minor	Small Canary Grass	Terrestrial	Asia	India	Punjab/ Haryana		Unit (2 States)	1998-1999	Year	2000	2001	2000	2001	One-time	274502	NA	NA	196542	#DIV/0!	274502	196542	#DIV/0!	AUD	2001	Effective	Observed	Report/Estimation	Authorities-Stakeholders	Funding/Research	Management_costs	no	Alok Bang/LBM	N
2001	NewIndia_16	Go	Vincent2002	Vincent David & Quirke Derek	English	2002	Official report	NA	Yes	Plantae	Tracheophyta	Liliopsida	Poales	Poaceae	Phalaris	Phalaris minor	Small Canary Grass	Terrestrial	Asia	India	Punjab/ Haryana		Unit (2 States)	1998-1999	Year	2000	2001	2000	2001	One-time	274502	NA	NA	196542	#DIV/0!	274502	196542	#DIV/0!	AUD	2001	Effective	Observed	Report/Estimation	Authorities-Stakeholders	Funding/Research	Management_costs	no	Alok Bang/LBM	N
2018	NewIndia_24	Go	WorshopIndia2018	Indian Statistical Institute & Asia Pacific Forest Invasive Species Network	English	2018	Conference proceedings	NA	Yes	Diverse/Unspecified	Diverse/Unspecified	Diverse/Unspecified	Diverse/Unspecified	Diverse/Unspecified	Diverse/Unspecified	diverse/Unspecified	Diverse/Unspecified	Diverse/Unspecified	Asia	India			Country	2018	Year	2018	2018	2018	2018	One-time	600000	NA	NA	8564.1	32350.6	600000	8564.1	32350.6	INR	2018	Effective	Observed	Report/Estimation	Authorities-Stakeholders	Education/Funding/Information/Research	Management_costs	no	Alok Bang	NA
2000	NewIndia_25	Go	CCRI	Central Coffee Research Institute, India	English	NA	Official report	NA	Yes	Animalia	Arthropoda	Insecta	Coleoptera	Curculionidae	Hypothenemus	Hypothenemus hampei	Coffee Borer Beetle	Terrestrial	Asia	India			Country	2000	Year	2000	2000	2000	2000	Potentially ongoing	2677038	NA	NA	3.81065e+06	#DIV/0!	2677038	3.81065e+06	#DIV/0!	USD	2000	Effective	Observed	Report/Estimation	Agriculture	Damage-Loss	Damage_costs	no	Alok Bang	N
2019	NewIndia_27	Go	MAFW2020	Ministry of Agriculture and Farmers Welfare, Government of India	English	2020	Online press release	NA	Yes	Animalia	Arthropoda	Insecta	Orthoptera	Acrididae	Schistocerca	Schistocerca gregaria	Desert Locust	Terrestrial	Asia	India	Rajasthan		Unit (State)	2019	Year	2019	2019	2019	2019	Potentially ongoing	1325400000	NA	NA	1.85814e+07	7.01905e+07	1325400000	1.85814e+07	7.01905e+07	INR	2019	Effective	Observed	Report/Estimation	Authorities-Stakeholders	Damage repair	Damage_costs	no	Alok Bang	N
2019	NewIndia_28	Go	MAFW2020	Ministry of Agriculture and Farmers Welfare, Government of India	English	2020	Online press release	NA	Yes	Animalia	Arthropoda	Insecta	Orthoptera	Acrididae	Schistocerca	Schistocerca gregaria	Desert Locust	Terrestrial	Asia	India	Gujarat		Unit (State)	2019	Year	2019	2019	2019	2019	Potentially ongoing	187400000	NA	NA	2.62724e+06	9.92433e+06	187400000	2.62724e+06	9.92433e+06	INR	2019	Effective	Observed	Report/Estimation	Authorities-Stakeholders	Damage repair	Damage_costs	no	Alok Bang	N
1960	NewIndia_35	Go	LWO2013	Locust Warning Organization, Government of India	English	2013	Report	NA	Yes	Animalia	Arthropoda	Insecta	Orthoptera	Acrididae	Schistocerca	Schistocerca gregaria	Desert Locust	Terrestrial	Asia	India			Unit (State)	1959-1962	Period	1959	1962	1959	1962	One-time	5000000	NA	NA	8.50829e+06	#DIV/0!	1250000	2.12707e+06	#DIV/0!	INR	1962	Publication year	Observed	Report/Estimation	Agriculture	Damage-Loss	Damage_costs	no	Alok Bang	N
1961	NewIndia_35	Go	LWO2013	Locust Warning Organization, Government of India	English	2013	Report	NA	Yes	Animalia	Arthropoda	Insecta	Orthoptera	Acrididae	Schistocerca	Schistocerca gregaria	Desert Locust	Terrestrial	Asia	India			Unit (State)	1959-1962	Period	1959	1962	1959	1962	One-time	5000000	NA	NA	8.50829e+06	#DIV/0!	1250000	2.12707e+06	#DIV/0!	INR	1962	Publication year	Observed	Report/Estimation	Agriculture	Damage-Loss	Damage_costs	no	Alok Bang	N
1962	NewIndia_35	Go	LWO2013	Locust Warning Organization, Government of India	English	2013	Report	NA	Yes	Animalia	Arthropoda	Insecta	Orthoptera	Acrididae	Schistocerca	Schistocerca gregaria	Desert Locust	Terrestrial	Asia	India			Unit (State)	1959-1962	Period	1959	1962	1959	1962	One-time	5000000	NA	NA	8.50829e+06	#DIV/0!	1250000	2.12707e+06	#DIV/0!	INR	1962	Publication year	Observed	Report/Estimation	Agriculture	Damage-Loss	Damage_costs	no	Alok Bang	N
2017	NewIndia_36	Go	NMHS_2017	National Mission on Himalayan Studies	English	2017	Web page	NA	Yes	Plantae	Diverse/Unspecified	Diverse/Unspecified	Diverse/Unspecified	Diverse/Unspecified	Diverse/Unspecified	Diverse/Unspecified	Invasive plants	Terrestrial	Asia	India	North India		Unit (multiple states in the Himalayan region)	2017-2019	Period	2017	2019	2017	2019	One-time	46839000	NA	NA	719255	2.62946e+06	15613000	239752	876486	INR	2017	Effective	Observed	Report/Estimation	Authorities-Stakeholders	Funding/Research	Management_costs	no	Alok Bang	N
2018	NewIndia_36	Go	NMHS_2017	National Mission on Himalayan Studies	English	2017	Web page	NA	Yes	Plantae	Diverse/Unspecified	Diverse/Unspecified	Diverse/Unspecified	Diverse/Unspecified	Diverse/Unspecified	Diverse/Unspecified	Invasive plants	Terrestrial	Asia	India	North India		Unit (multiple states in the Himalayan region)	2017-2019	Period	2017	2019	2017	2019	One-time	46839000	NA	NA	719255	2.62946e+06	15613000	239752	876486	INR	2017	Effective	Observed	Report/Estimation	Authorities-Stakeholders	Funding/Research	Management_costs	no	Alok Bang	N
2019	NewIndia_36	Go	NMHS_2017	National Mission on Himalayan Studies	English	2017	Web page	NA	Yes	Plantae	Diverse/Unspecified	Diverse/Unspecified	Diverse/Unspecified	Diverse/Unspecified	Diverse/Unspecified	Diverse/Unspecified	Invasive plants	Terrestrial	Asia	India	North India		Unit (multiple states in the Himalayan region)	2017-2019	Period	2017	2019	2017	2019	One-time	46839000	NA	NA	719255	2.62946e+06	15613000	239752	876486	INR	2017	Effective	Observed	Report/Estimation	Authorities-Stakeholders	Funding/Research	Management_costs	no	Alok Bang	N
1996	NewIndia_37	Go	Jitendra2019	Jitendra, Down to Earth Team	English	2019	Journal article	NA	Yes	Diverse/Unspecified	Diverse/Unspecified	Diverse/Unspecified	Diverse/Unspecified	Diverse/Unspecified	Diverse/Unspecified	diverse/Unspecified	invasive plant species?	Diverse/Unspecified	Asia	India			Country	1996-2001	Period	1996	2001	1996	2001	One-time	200000	NA	NA	276867	#DIV/0!	33333.3	46144.5	#DIV/0!	USD	2001	Effective	Observed	Report/Estimation	Authorities-Stakeholders	Administration/Surveillance	Management_costs	no	Alok Bang	NA
1997	NewIndia_37	Go	Jitendra2019	Jitendra, Down to Earth Team	English	2019	Journal article	NA	Yes	Diverse/Unspecified	Diverse/Unspecified	Diverse/Unspecified	Diverse/Unspecified	Diverse/Unspecified	Diverse/Unspecified	diverse/Unspecified	invasive plant species?	Diverse/Unspecified	Asia	India			Country	1996-2001	Period	1996	2001	1996	2001	One-time	200000	NA	NA	276867	#DIV/0!	33333.3	46144.5	#DIV/0!	USD	2001	Effective	Observed	Report/Estimation	Authorities-Stakeholders	Administration/Surveillance	Management_costs	no	Alok Bang	NA
1998	NewIndia_37	Go	Jitendra2019	Jitendra, Down to Earth Team	English	2019	Journal article	NA	Yes	Diverse/Unspecified	Diverse/Unspecified	Diverse/Unspecified	Diverse/Unspecified	Diverse/Unspecified	Diverse/Unspecified	diverse/Unspecified	invasive plant species?	Diverse/Unspecified	Asia	India			Country	1996-2001	Period	1996	2001	1996	2001	One-time	200000	NA	NA	276867	#DIV/0!	33333.3	46144.5	#DIV/0!	USD	2001	Effective	Observed	Report/Estimation	Authorities-Stakeholders	Administration/Surveillance	Management_costs	no	Alok Bang	NA
1999	NewIndia_37	Go	Jitendra2019	Jitendra, Down to Earth Team	English	2019	Journal article	NA	Yes	Diverse/Unspecified	Diverse/Unspecified	Diverse/Unspecified	Diverse/Unspecified	Diverse/Unspecified	Diverse/Unspecified	diverse/Unspecified	invasive plant species?	Diverse/Unspecified	Asia	India			Country	1996-2001	Period	1996	2001	1996	2001	One-time	200000	NA	NA	276867	#DIV/0!	33333.3	46144.5	#DIV/0!	USD	2001	Effective	Observed	Report/Estimation	Authorities-Stakeholders	Administration/Surveillance	Management_costs	no	Alok Bang	NA
2000	NewIndia_37	Go	Jitendra2019	Jitendra, Down to Earth Team	English	2019	Journal article	NA	Yes	Diverse/Unspecified	Diverse/Unspecified	Diverse/Unspecified	Diverse/Unspecified	Diverse/Unspecified	Diverse/Unspecified	diverse/Unspecified	invasive plant species?	Diverse/Unspecified	Asia	India			Country	1996-2001	Period	1996	2001	1996	2001	One-time	200000	NA	NA	276867	#DIV/0!	33333.3	46144.5	#DIV/0!	USD	2001	Effective	Observed	Report/Estimation	Authorities-Stakeholders	Administration/Surveillance	Management_costs	no	Alok Bang	NA
2001	NewIndia_37	Go	Jitendra2019	Jitendra, Down to Earth Team	English	2019	Journal article	NA	Yes	Diverse/Unspecified	Diverse/Unspecified	Diverse/Unspecified	Diverse/Unspecified	Diverse/Unspecified	Diverse/Unspecified	diverse/Unspecified	invasive plant species?	Diverse/Unspecified	Asia	India			Country	1996-2001	Period	1996	2001	1996	2001	One-time	200000	NA	NA	276867	#DIV/0!	33333.3	46144.5	#DIV/0!	USD	2001	Effective	Observed	Report/Estimation	Authorities-Stakeholders	Administration/Surveillance	Management_costs	no	Alok Bang	NA
2020	NewIndia_38	Go	Saroa2020	Saroa	Hindi	2020	Newspaper	NA	Yes	Animalia	Arthropoda	Insecta	Lepidoptera	Noctuidae	Spodoptera	Spodoptera frugiperda	Fall Armyworm	Terrestrial	Asia	India	Himachal Pradesh	Una	Unit (District)	2020	Year	2020	2020	2020	2020	Potentially ongoing	256500000	NA	NA	3.59598e+06	1.35837e+07	256500000	3.59598e+06	1.35837e+07	INR	2020	Effective	Observed	Report/Estimation	Agriculture	Damaga-Loss	Damage_costs	no	Alok Bang	N
2004	991	TC	541	Barnard and Waage	English	2004	Official report	NA	Yes	Diverse/Unspecified	Diverse/Unspecified	Diverse/Unspecified	Diverse/Unspecified	Diverse/Unspecified	Diverse/Unspecified	Diverse/Unspecified	Diverse (animals/pathogens/plants)	diverse/Unspecified	Asia	India		Unspecified	Country	2004	Year	2004	Unspecified	2004	2004	Potentially ongoing	91000000000	NA	NA	118000000000	489000000000	91000000000	118000000000	489000000000	USD	2004	Publication year	Observed	Report/Estimation	Agriculture/Forestry	Damage-Loss	Damage_costs	no	Christophe Diagne/Claire Assailly/Lise Nuninger
2006	2219	TC	59	Garg et al	English	2008	Peer-reviewed article	NA	Yes	Animalia	Arthropoda	Insecta	Diptera	Culicidae	Aedes	Aedes aegypti	Yellow fever mosquito	semi-aquatic	Asia	India		Unspecified	Country	2006	Year	2006	Unspecified	2006	2006	Potentially ongoing	2700000	NA	NA	3.28299e+06	1.15403e+07	2700000	3.28299e+06	1.15403e+07	USD	2006	Publication year	Observed	Report/Estimation	Authorities-Stakeholders/Health/Public and social welfare	Medical care	Damage_costs	no	David Roiz/Frederic Jourdain
2003	2220	TC	63	Murtola et al	English	2010	Peer-reviewed article	NA	Yes	Animalia	Arthropoda	Insecta	Diptera	Culicidae	Aedes	Aedes aegypti	Yellow fever mosquito	semi-aquatic	Asia	India	Gujarat	Gujarat	Site	2003-2008	Period	2003	2008	2003	2008	One-time	20000000000	NA	NA	5.24428e+08	79177966449	3340000000	8.74046e+07	13196327741	INR	2008	Effective	Observed	Report/Estimation	Authorities-Stakeholders/Health/Public and social welfare	Medical care	Damage_costs	no	David Roiz/Frederic Jourdain
2004	2220	TC	63	Murtola et al	English	2010	Peer-reviewed article	NA	Yes	Animalia	Arthropoda	Insecta	Diptera	Culicidae	Aedes	Aedes aegypti	Yellow fever mosquito	semi-aquatic	Asia	India	Gujarat	Gujarat	Site	2003-2008	Period	2003	2008	2003	2008	One-time	20000000000	NA	NA	5.24428e+08	79177966449	3340000000	8.74046e+07	13196327741	INR	2008	Effective	Observed	Report/Estimation	Authorities-Stakeholders/Health/Public and social welfare	Medical care	Damage_costs	no	David Roiz/Frederic Jourdain
2005	2220	TC	63	Murtola et al	English	2010	Peer-reviewed article	NA	Yes	Animalia	Arthropoda	Insecta	Diptera	Culicidae	Aedes	Aedes aegypti	Yellow fever mosquito	semi-aquatic	Asia	India	Gujarat	Gujarat	Site	2003-2008	Period	2003	2008	2003	2008	One-time	20000000000	NA	NA	5.24428e+08	79177966449	3340000000	8.74046e+07	13196327741	INR	2008	Effective	Observed	Report/Estimation	Authorities-Stakeholders/Health/Public and social welfare	Medical care	Damage_costs	no	David Roiz/Frederic Jourdain
2006	2220	TC	63	Murtola et al	English	2010	Peer-reviewed article	NA	Yes	Animalia	Arthropoda	Insecta	Diptera	Culicidae	Aedes	Aedes aegypti	Yellow fever mosquito	semi-aquatic	Asia	India	Gujarat	Gujarat	Site	2003-2008	Period	2003	2008	2003	2008	One-time	20000000000	NA	NA	5.24428e+08	79177966449	3340000000	8.74046e+07	13196327741	INR	2008	Effective	Observed	Report/Estimation	Authorities-Stakeholders/Health/Public and social welfare	Medical care	Damage_costs	no	David Roiz/Frederic Jourdain
2007	2220	TC	63	Murtola et al	English	2010	Peer-reviewed article	NA	Yes	Animalia	Arthropoda	Insecta	Diptera	Culicidae	Aedes	Aedes aegypti	Yellow fever mosquito	semi-aquatic	Asia	India	Gujarat	Gujarat	Site	2003-2008	Period	2003	2008	2003	2008	One-time	20000000000	NA	NA	5.24428e+08	79177966449	3340000000	8.74046e+07	13196327741	INR	2008	Effective	Observed	Report/Estimation	Authorities-Stakeholders/Health/Public and social welfare	Medical care	Damage_costs	no	David Roiz/Frederic Jourdain
2008	2220	TC	63	Murtola et al	English	2010	Peer-reviewed article	NA	Yes	Animalia	Arthropoda	Insecta	Diptera	Culicidae	Aedes	Aedes aegypti	Yellow fever mosquito	semi-aquatic	Asia	India	Gujarat	Gujarat	Site	2003-2008	Period	2003	2008	2003	2008	One-time	20000000000	NA	NA	5.24428e+08	79177966449	3340000000	8.74046e+07	13196327741	INR	2008	Effective	Observed	Report/Estimation	Authorities-Stakeholders/Health/Public and social welfare	Medical care	Damage_costs	no	David Roiz/Frederic Jourdain
2003	2221	TC	63	Murtola et al	English	2010	Peer-reviewed article	NA	Yes	Animalia	Arthropoda	Insecta	Diptera	Culicidae	Aedes	Aedes aegypti	Yellow fever mosquito	semi-aquatic	Asia	India	Gujarat	Gujarat	Site	2003-2008	Period	2003	2008	2003	2008	One-time	1140000000	NA	NA	2.86463e+07	5149755608	190000000	4.77438e+06	8.58293e+08	INR	2008	Effective	Observed	Report/Estimation	Authorities-Stakeholders/Health/Public and social welfare	Medical care	Damage_costs	no	David Roiz/Frederic Jourdain
2004	2221	TC	63	Murtola et al	English	2010	Peer-reviewed article	NA	Yes	Animalia	Arthropoda	Insecta	Diptera	Culicidae	Aedes	Aedes aegypti	Yellow fever mosquito	semi-aquatic	Asia	India	Gujarat	Gujarat	Site	2003-2008	Period	2003	2008	2003	2008	One-time	1140000000	NA	NA	2.86463e+07	5149755608	190000000	4.77438e+06	8.58293e+08	INR	2008	Effective	Observed	Report/Estimation	Authorities-Stakeholders/Health/Public and social welfare	Medical care	Damage_costs	no	David Roiz/Frederic Jourdain
2005	2221	TC	63	Murtola et al	English	2010	Peer-reviewed article	NA	Yes	Animalia	Arthropoda	Insecta	Diptera	Culicidae	Aedes	Aedes aegypti	Yellow fever mosquito	semi-aquatic	Asia	India	Gujarat	Gujarat	Site	2003-2008	Period	2003	2008	2003	2008	One-time	1140000000	NA	NA	2.86463e+07	5149755608	190000000	4.77438e+06	8.58293e+08	INR	2008	Effective	Observed	Report/Estimation	Authorities-Stakeholders/Health/Public and social welfare	Medical care	Damage_costs	no	David Roiz/Frederic Jourdain
2006	2221	TC	63	Murtola et al	English	2010	Peer-reviewed article	NA	Yes	Animalia	Arthropoda	Insecta	Diptera	Culicidae	Aedes	Aedes aegypti	Yellow fever mosquito	semi-aquatic	Asia	India	Gujarat	Gujarat	Site	2003-2008	Period	2003	2008	2003	2008	One-time	1140000000	NA	NA	2.86463e+07	5149755608	190000000	4.77438e+06	8.58293e+08	INR	2008	Effective	Observed	Report/Estimation	Authorities-Stakeholders/Health/Public and social welfare	Medical care	Damage_costs	no	David Roiz/Frederic Jourdain
2007	2221	TC	63	Murtola et al	English	2010	Peer-reviewed article	NA	Yes	Animalia	Arthropoda	Insecta	Diptera	Culicidae	Aedes	Aedes aegypti	Yellow fever mosquito	semi-aquatic	Asia	India	Gujarat	Gujarat	Site	2003-2008	Period	2003	2008	2003	2008	One-time	1140000000	NA	NA	2.86463e+07	5149755608	190000000	4.77438e+06	8.58293e+08	INR	2008	Effective	Observed	Report/Estimation	Authorities-Stakeholders/Health/Public and social welfare	Medical care	Damage_costs	no	David Roiz/Frederic Jourdain
2008	2221	TC	63	Murtola et al	English	2010	Peer-reviewed article	NA	Yes	Animalia	Arthropoda	Insecta	Diptera	Culicidae	Aedes	Aedes aegypti	Yellow fever mosquito	semi-aquatic	Asia	India	Gujarat	Gujarat	Site	2003-2008	Period	2003	2008	2003	2008	One-time	1140000000	NA	NA	2.86463e+07	5149755608	190000000	4.77438e+06	8.58293e+08	INR	2008	Effective	Observed	Report/Estimation	Authorities-Stakeholders/Health/Public and social welfare	Medical care	Damage_costs	no	David Roiz/Frederic Jourdain
2006	2222	TC	65	Seyler et al	English	2010	Peer-reviewed article	NA	Yes	Animalia	Arthropoda	Insecta	Diptera	Culicidae	Aedes	Aedes aegypti	Yellow fever mosquito	semi-aquatic	Asia	India	Andhra Pradesh	Andhra Pradesh	Country	2005-2006	Year	2005	2006	2006	2006	One-time	12400000	NA	NA	1.3939e+07	4.89983e+07	12400000	1.3939e+07	4.89983e+07	USD	2010	Publication year	Observed	Report/Estimation	Authorities-Stakeholders/Health/Public and social welfare	Medical care	Damage_costs	no	David Roiz/Frederic Jourdain
2006	2224	TC	112	Shepard et al	English	2014	Peer-reviewed article	NA	Yes	Animalia	Arthropoda	Insecta	Diptera	Culicidae	Aedes	Aedes aegypti	Yellow fever mosquito	semi-aquatic	Asia	India		Unspecified	Country	2006-2012	Period	2006	2012	2006	2012	One-time	3840000000	NA	NA	3971842304	17606779900	548000000	5.67406e+08	2515254271	USD	2014	Publication year	Observed	Report/Estimation	Authorities-Stakeholders/Health/Public and social welfare	Medical care	Damage_costs	no	David Roiz/Frederic Jourdain
2007	2224	TC	112	Shepard et al	English	2014	Peer-reviewed article	NA	Yes	Animalia	Arthropoda	Insecta	Diptera	Culicidae	Aedes	Aedes aegypti	Yellow fever mosquito	semi-aquatic	Asia	India		Unspecified	Country	2006-2012	Period	2006	2012	2006	2012	One-time	3840000000	NA	NA	3971842304	17606779900	548000000	5.67406e+08	2515254271	USD	2014	Publication year	Observed	Report/Estimation	Authorities-Stakeholders/Health/Public and social welfare	Medical care	Damage_costs	no	David Roiz/Frederic Jourdain
2008	2224	TC	112	Shepard et al	English	2014	Peer-reviewed article	NA	Yes	Animalia	Arthropoda	Insecta	Diptera	Culicidae	Aedes	Aedes aegypti	Yellow fever mosquito	semi-aquatic	Asia	India		Unspecified	Country	2006-2012	Period	2006	2012	2006	2012	One-time	3840000000	NA	NA	3971842304	17606779900	548000000	5.67406e+08	2515254271	USD	2014	Publication year	Observed	Report/Estimation	Authorities-Stakeholders/Health/Public and social welfare	Medical care	Damage_costs	no	David Roiz/Frederic Jourdain
2009	2224	TC	112	Shepard et al	English	2014	Peer-reviewed article	NA	Yes	Animalia	Arthropoda	Insecta	Diptera	Culicidae	Aedes	Aedes aegypti	Yellow fever mosquito	semi-aquatic	Asia	India		Unspecified	Country	2006-2012	Period	2006	2012	2006	2012	One-time	3840000000	NA	NA	3971842304	17606779900	548000000	5.67406e+08	2515254271	USD	2014	Publication year	Observed	Report/Estimation	Authorities-Stakeholders/Health/Public and social welfare	Medical care	Damage_costs	no	David Roiz/Frederic Jourdain
2010	2224	TC	112	Shepard et al	English	2014	Peer-reviewed article	NA	Yes	Animalia	Arthropoda	Insecta	Diptera	Culicidae	Aedes	Aedes aegypti	Yellow fever mosquito	semi-aquatic	Asia	India		Unspecified	Country	2006-2012	Period	2006	2012	2006	2012	One-time	3840000000	NA	NA	3971842304	17606779900	548000000	5.67406e+08	2515254271	USD	2014	Publication year	Observed	Report/Estimation	Authorities-Stakeholders/Health/Public and social welfare	Medical care	Damage_costs	no	David Roiz/Frederic Jourdain
2011	2224	TC	112	Shepard et al	English	2014	Peer-reviewed article	NA	Yes	Animalia	Arthropoda	Insecta	Diptera	Culicidae	Aedes	Aedes aegypti	Yellow fever mosquito	semi-aquatic	Asia	India		Unspecified	Country	2006-2012	Period	2006	2012	2006	2012	One-time	3840000000	NA	NA	3971842304	17606779900	548000000	5.67406e+08	2515254271	USD	2014	Publication year	Observed	Report/Estimation	Authorities-Stakeholders/Health/Public and social welfare	Medical care	Damage_costs	no	David Roiz/Frederic Jourdain
2012	2224	TC	112	Shepard et al	English	2014	Peer-reviewed article	NA	Yes	Animalia	Arthropoda	Insecta	Diptera	Culicidae	Aedes	Aedes aegypti	Yellow fever mosquito	semi-aquatic	Asia	India		Unspecified	Country	2006-2012	Period	2006	2012	2006	2012	One-time	3840000000	NA	NA	3971842304	17606779900	548000000	5.67406e+08	2515254271	USD	2014	Publication year	Observed	Report/Estimation	Authorities-Stakeholders/Health/Public and social welfare	Medical care	Damage_costs	no	David Roiz/Frederic Jourdain
2007	2225	TC	271	Vijayakumar et al	English	2013	Peer-reviewed article	NA	Yes	Animalia	Arthropoda	Insecta	Diptera	Culicidae	Aedes	Aedes aegypti	Yellow fever mosquito	semi-aquatic	Asia	India	Kerala	Kerala	Country	2007	Year	2007	Unspecified	2007	2007	Potentially ongoing	13000000	NA	NA	1.53686e+07	6.81273e+07	13000000	1.53686e+07	6.81273e+07	USD	2007	Publication year	Observed	Report/Estimation	Authorities-Stakeholders/Health/Public and social welfare	Medical care	Damage_costs	no	David Roiz/Frederic Jourdain
2006	2363	TC	112	Shepard et al	English	2014	Peer-reviewed article	NA	Yes	Animalia	Arthropoda	Insecta	Diptera	Culicidae	Aedes	Aedes aegypti	Yellow fever mosquito	semi-aquatic	Asia	India		Unspecified	Country	2006-2012	Period	2006	2012	2006	2012	One-time	3860000000	NA	NA	4000833854	14350293681	552000000	5.71548e+08	2050041954	USD	2014	Publication year	Observed	Report/Estimation	Authorities-Stakeholders/Health/Public and social welfare	Medical care	Damage_costs	no	David Roiz/Frederic Jourdain
2007	2363	TC	112	Shepard et al	English	2014	Peer-reviewed article	NA	Yes	Animalia	Arthropoda	Insecta	Diptera	Culicidae	Aedes	Aedes aegypti	Yellow fever mosquito	semi-aquatic	Asia	India		Unspecified	Country	2006-2012	Period	2006	2012	2006	2012	One-time	3860000000	NA	NA	4000833854	14350293681	552000000	5.71548e+08	2050041954	USD	2014	Publication year	Observed	Report/Estimation	Authorities-Stakeholders/Health/Public and social welfare	Medical care	Damage_costs	no	David Roiz/Frederic Jourdain
2008	2363	TC	112	Shepard et al	English	2014	Peer-reviewed article	NA	Yes	Animalia	Arthropoda	Insecta	Diptera	Culicidae	Aedes	Aedes aegypti	Yellow fever mosquito	semi-aquatic	Asia	India		Unspecified	Country	2006-2012	Period	2006	2012	2006	2012	One-time	3860000000	NA	NA	4000833854	14350293681	552000000	5.71548e+08	2050041954	USD	2014	Publication year	Observed	Report/Estimation	Authorities-Stakeholders/Health/Public and social welfare	Medical care	Damage_costs	no	David Roiz/Frederic Jourdain
2009	2363	TC	112	Shepard et al	English	2014	Peer-reviewed article	NA	Yes	Animalia	Arthropoda	Insecta	Diptera	Culicidae	Aedes	Aedes aegypti	Yellow fever mosquito	semi-aquatic	Asia	India		Unspecified	Country	2006-2012	Period	2006	2012	2006	2012	One-time	3860000000	NA	NA	4000833854	14350293681	552000000	5.71548e+08	2050041954	USD	2014	Publication year	Observed	Report/Estimation	Authorities-Stakeholders/Health/Public and social welfare	Medical care	Damage_costs	no	David Roiz/Frederic Jourdain
2010	2363	TC	112	Shepard et al	English	2014	Peer-reviewed article	NA	Yes	Animalia	Arthropoda	Insecta	Diptera	Culicidae	Aedes	Aedes aegypti	Yellow fever mosquito	semi-aquatic	Asia	India		Unspecified	Country	2006-2012	Period	2006	2012	2006	2012	One-time	3860000000	NA	NA	4000833854	14350293681	552000000	5.71548e+08	2050041954	USD	2014	Publication year	Observed	Report/Estimation	Authorities-Stakeholders/Health/Public and social welfare	Medical care	Damage_costs	no	David Roiz/Frederic Jourdain
2011	2363	TC	112	Shepard et al	English	2014	Peer-reviewed article	NA	Yes	Animalia	Arthropoda	Insecta	Diptera	Culicidae	Aedes	Aedes aegypti	Yellow fever mosquito	semi-aquatic	Asia	India		Unspecified	Country	2006-2012	Period	2006	2012	2006	2012	One-time	3860000000	NA	NA	4000833854	14350293681	552000000	5.71548e+08	2050041954	USD	2014	Publication year	Observed	Report/Estimation	Authorities-Stakeholders/Health/Public and social welfare	Medical care	Damage_costs	no	David Roiz/Frederic Jourdain
2012	2363	TC	112	Shepard et al	English	2014	Peer-reviewed article	NA	Yes	Animalia	Arthropoda	Insecta	Diptera	Culicidae	Aedes	Aedes aegypti	Yellow fever mosquito	semi-aquatic	Asia	India		Unspecified	Country	2006-2012	Period	2006	2012	2006	2012	One-time	3860000000	NA	NA	4000833854	14350293681	552000000	5.71548e+08	2050041954	USD	2014	Publication year	Observed	Report/Estimation	Authorities-Stakeholders/Health/Public and social welfare	Medical care	Damage_costs	no	David Roiz/Frederic Jourdain
2003	2398	TC	63	Murtola et al	English	2010	Peer-reviewed article	NA	Yes	Animalia	Arthropoda	Insecta	Diptera	Culicidae	Aedes	Aedes aegypti	Yellow fever mosquito	semi-aquatic	Asia	India	Gujarat	Gujarat	Site	2003-2008	Period	2003	2008	2003	2008	One-time	1600000000	NA	NA	5.95878e+07	7643740697	266000000	9.9313e+06	1273956783	INR	2008	Effective	Observed	Report/Estimation	Authorities-Stakeholders/Health	Control	Management_costs	no	David Roiz/Frederic Jourdain
2004	2398	TC	63	Murtola et al	English	2010	Peer-reviewed article	NA	Yes	Animalia	Arthropoda	Insecta	Diptera	Culicidae	Aedes	Aedes aegypti	Yellow fever mosquito	semi-aquatic	Asia	India	Gujarat	Gujarat	Site	2003-2008	Period	2003	2008	2003	2008	One-time	1600000000	NA	NA	5.95878e+07	7643740697	266000000	9.9313e+06	1273956783	INR	2008	Effective	Observed	Report/Estimation	Authorities-Stakeholders/Health	Control	Management_costs	no	David Roiz/Frederic Jourdain
2005	2398	TC	63	Murtola et al	English	2010	Peer-reviewed article	NA	Yes	Animalia	Arthropoda	Insecta	Diptera	Culicidae	Aedes	Aedes aegypti	Yellow fever mosquito	semi-aquatic	Asia	India	Gujarat	Gujarat	Site	2003-2008	Period	2003	2008	2003	2008	One-time	1600000000	NA	NA	5.95878e+07	7643740697	266000000	9.9313e+06	1273956783	INR	2008	Effective	Observed	Report/Estimation	Authorities-Stakeholders/Health	Control	Management_costs	no	David Roiz/Frederic Jourdain
2006	2398	TC	63	Murtola et al	English	2010	Peer-reviewed article	NA	Yes	Animalia	Arthropoda	Insecta	Diptera	Culicidae	Aedes	Aedes aegypti	Yellow fever mosquito	semi-aquatic	Asia	India	Gujarat	Gujarat	Site	2003-2008	Period	2003	2008	2003	2008	One-time	1600000000	NA	NA	5.95878e+07	7643740697	266000000	9.9313e+06	1273956783	INR	2008	Effective	Observed	Report/Estimation	Authorities-Stakeholders/Health	Control	Management_costs	no	David Roiz/Frederic Jourdain
2007	2398	TC	63	Murtola et al	English	2010	Peer-reviewed article	NA	Yes	Animalia	Arthropoda	Insecta	Diptera	Culicidae	Aedes	Aedes aegypti	Yellow fever mosquito	semi-aquatic	Asia	India	Gujarat	Gujarat	Site	2003-2008	Period	2003	2008	2003	2008	One-time	1600000000	NA	NA	5.95878e+07	7643740697	266000000	9.9313e+06	1273956783	INR	2008	Effective	Observed	Report/Estimation	Authorities-Stakeholders/Health	Control	Management_costs	no	David Roiz/Frederic Jourdain
2008	2398	TC	63	Murtola et al	English	2010	Peer-reviewed article	NA	Yes	Animalia	Arthropoda	Insecta	Diptera	Culicidae	Aedes	Aedes aegypti	Yellow fever mosquito	semi-aquatic	Asia	India	Gujarat	Gujarat	Site	2003-2008	Period	2003	2008	2003	2008	One-time	1600000000	NA	NA	5.95878e+07	7643740697	266000000	9.9313e+06	1273956783	INR	2008	Effective	Observed	Report/Estimation	Authorities-Stakeholders/Health	Control	Management_costs	no	David Roiz/Frederic Jourdain
1996	SC51		3	Fatik Baran Modal	English	2011	Peer-reviewed article	NA	Yes	Plantae	Tracheophyta	Magnoliopsida	Lamiales	Verbenaceae	Lantana	Lantana camara	lantana	terrestrial	Asia	India		Unspecified	Country	One-time	Year	1996	1996	1996	1996	One-time	70	NA	NA	109.394	475.311	70	109.394	475.311	USD	1996	Publication year	Observed	Report/Estimation	Forestry	Control	Management_costs	no	Achyut Kumar	N
2006	SC53		Wise2007	Wise, R.M., van Wilgen, B.W., Hill, M.P., Schulthess, F., Tweddle, D., Chabi-Olay, A. and Zimmermann, H.G.	English	2007	Official report	NA	Yes	Plantae	Tracheophyta	Magnoliopsida	Asterales	Asteraceae	Parthenium	Parthenium hysterophorus	Parthenium weed	terrestrial	Asia	India		India	Site	2006	Period	2006	2006	2006	2006	One-time	70	NA	NA	85.1145	351.938	70	85.1145	351.938	USD	2006	Effective	Observed	Report/Estimation	Authorities-Stakeholders	Control	Management_costs	no	Desika Moodley	N
1997	SC223		2	KFRI (India), CABI (UK)	English	1999	Official report	NA	No	Plantae	Tracheophyta	Magnoliopsida	Asterales	Asteraceae	Mikania	Mikania micrantha	mile-a-minute weed	terrestrial	Asia	India	South India	South India	Site	One-time	Period	1997	1999	1997	1999	One-time	1400	NA	NA	41.0726	204.336	466.667	13.6909	68.1119	INR	2001	Publication year	Observed	Report/Estimation	Forestry	Control	Management_costs	no	Achyut Kumar	N
1998	SC223		2	KFRI (India), CABI (UK)	English	1999	Official report	NA	No	Plantae	Tracheophyta	Magnoliopsida	Asterales	Asteraceae	Mikania	Mikania micrantha	mile-a-minute weed	terrestrial	Asia	India	South India	South India	Site	One-time	Period	1997	1999	1997	1999	One-time	1400	NA	NA	41.0726	204.336	466.667	13.6909	68.1119	INR	2001	Publication year	Observed	Report/Estimation	Forestry	Control	Management_costs	no	Achyut Kumar	N
1999	SC223		2	KFRI (India), CABI (UK)	English	1999	Official report	NA	No	Plantae	Tracheophyta	Magnoliopsida	Asterales	Asteraceae	Mikania	Mikania micrantha	mile-a-minute weed	terrestrial	Asia	India	South India	South India	Site	One-time	Period	1997	1999	1997	1999	One-time	1400	NA	NA	41.0726	204.336	466.667	13.6909	68.1119	INR	2001	Publication year	Observed	Report/Estimation	Forestry	Control	Management_costs	no	Achyut Kumar	N
1997	SC250		2	KFRI (India), CABI (UK)	English	1999	Official report	NA	No	Plantae	Tracheophyta	Magnoliopsida	Asterales	Asteraceae	Mikania	Mikania micrantha	mile-a-minute weed	terrestrial	Asia	India	South India	South India	Site	One-time	Period	1997	1999	1997	1999	One-time	1938.5	NA	NA	66.2531	307.949	646.167	22.0844	102.65	INR	1999	Publication year	Observed	Report/Estimation	Agriculture/Environment/Health/Public and social welfare	Control	Management_costs	yes	Achyut Kumar	N
1998	SC250		2	KFRI (India), CABI (UK)	English	1999	Official report	NA	No	Plantae	Tracheophyta	Magnoliopsida	Asterales	Asteraceae	Mikania	Mikania micrantha	mile-a-minute weed	terrestrial	Asia	India	South India	South India	Site	One-time	Period	1997	1999	1997	1999	One-time	1938.5	NA	NA	66.2531	307.949	646.167	22.0844	102.65	INR	1999	Publication year	Observed	Report/Estimation	Agriculture/Environment/Health/Public and social welfare	Control	Management_costs	yes	Achyut Kumar	N
1999	SC250		2	KFRI (India), CABI (UK)	English	1999	Official report	NA	No	Plantae	Tracheophyta	Magnoliopsida	Asterales	Asteraceae	Mikania	Mikania micrantha	mile-a-minute weed	terrestrial	Asia	India	South India	South India	Site	One-time	Period	1997	1999	1997	1999	One-time	1938.5	NA	NA	66.2531	307.949	646.167	22.0844	102.65	INR	1999	Publication year	Observed	Report/Estimation	Agriculture/Environment/Health/Public and social welfare	Control	Management_costs	yes	Achyut Kumar	N
1997	SC366		2	KFRI (India), CABI (UK)	English	1999	Official report	NA	No	Plantae	Tracheophyta	Magnoliopsida	Asterales	Asteraceae	Mikania	Mikania micrantha	mile-a-minute weed	terrestrial	Asia	India	South India	South India	Site	One-time	Period	1997	1999	1997	1999	One-time	6274	NA	NA	198.72	951.014	2091.33	66.2399	317.005	INR	2000	Publication year	Observed	Report/Estimation	Agriculture/Environment/Health/Public and social welfare	Control	Management_costs	yes	Achyut Kumar	N
1998	SC366		2	KFRI (India), CABI (UK)	English	1999	Official report	NA	No	Plantae	Tracheophyta	Magnoliopsida	Asterales	Asteraceae	Mikania	Mikania micrantha	mile-a-minute weed	terrestrial	Asia	India	South India	South India	Site	One-time	Period	1997	1999	1997	1999	One-time	6274	NA	NA	198.72	951.014	2091.33	66.2399	317.005	INR	2000	Publication year	Observed	Report/Estimation	Agriculture/Environment/Health/Public and social welfare	Control	Management_costs	yes	Achyut Kumar	N
1999	SC366		2	KFRI (India), CABI (UK)	English	1999	Official report	NA	No	Plantae	Tracheophyta	Magnoliopsida	Asterales	Asteraceae	Mikania	Mikania micrantha	mile-a-minute weed	terrestrial	Asia	India	South India	South India	Site	One-time	Period	1997	1999	1997	1999	One-time	6274	NA	NA	198.72	951.014	2091.33	66.2399	317.005	INR	2000	Publication year	Observed	Report/Estimation	Agriculture/Environment/Health/Public and social welfare	Control	Management_costs	yes	Achyut Kumar	N
2009	SC397		1	Love A, Babu S, Babu C R	English	2009	Peer-reviewed article	NA	Yes	Plantae	Tracheophyta	Magnoliopsida	Lamiales	Verbenaceae	Lantana	Lantana camara	lantana	terrestrial	Asia	India		Unspecified	Country	One-time	Year	2009	2009	2009	2009	One-time	9000	NA	NA	212.435	791.933	9000	212.435	791.933	INR	2009	Publication year	Observed	Report/Estimation	Forestry	Control/Damage repair	Mixed_costs	no	Achyut Kumar	N
2020	SC403		5	Selvaraj K, Sumalatha B V, Ramanujam B, Pornesha B, Venkatesan T, Shylesha A N, Gupta A, Ramya R S, Ballal C R	English	2020	Official report	NA	No	Animalia	Arthropoda	Insecta	Hemiptera	Pseudococcidae	Aleurodicus	Aleurodicus rugioperculatus	Rugose Spiralling Whitefly	terrestrial	Asia	India		Unspecified	Country	One-time	Year	2020	2020	2020	2020	One-time	9500	NA	NA	133.185	503.101	9500	133.185	503.101	INR	2020	Publication year	Observed	Report/Estimation	Agriculture/Environment/Health/Public and social welfare	Control	Management_costs	yes	Achyut Kumar	N
1998	SC929		Rao2005	Rao, DVS	English	2005	Peer-reviewed article	NA	Yes	Diverse/Unspecified	Diverse/Unspecified	Diverse/Unspecified	Diverse/Unspecified	Diverse/Unspecified	Diverse/Unspecified	Diverse/Unspecified	Biofouling (cleaning offshore oil platforms)	aquatic	Asia	India		India	Country	1998	Year	1998	1998	1998	1998	One-time	400000	NA	NA	601490	2.72204e+06	400000	601490	2.72204e+06	USD	1998	Publication year	Observed	Report/Estimation	Public and social welfare	Control/Maintenance	Management_costs	no	Chunlong Liu/Wen Xiong	N
1998	SC1657		Rao2005	Rao, DVS	English	2005	Peer-reviewed article	NA	Yes	Diverse/Unspecified	Diverse/Unspecified	Diverse/Unspecified	Diverse/Unspecified	Diverse/Unspecified	Diverse/Unspecified	Diverse/Unspecified	Biofouling (clean the merchant navy ships)	aquatic	Asia	India		India	Country	1998	Year	1998	1998	1998	1998	One-time	28000000	NA	NA	4.21043e+07	190543031	28000000	4.21043e+07	190543031	USD	1998	Publication year	Observed	Report/Estimation	Public and social welfare	Control/Maintenance	Management_costs	no	Chunlong Liu/Wen Xiong	N
1994	SC1837		Rao2005	Rao, DVS	English	2005	Peer-reviewed article	NA	Yes	Diverse/Unspecified	Diverse/Unspecified	Diverse/Unspecified	Diverse/Unspecified	Diverse/Unspecified	Diverse/Unspecified	Diverse/Unspecified	Viral, fungal and bacterial pathogens	aquatic	Asia	India		The East Coast Of India	Country	1994-1995	Period	1994	1995	1994	1995	One-time	100000000	NA	NA	1.6537e+08	717949766	50000000	8.2685e+07	358974883	USD	1994	Effective	Observed	Report/Estimation	Fishery	Damage-Loss	Damage_costs	no	Chunlong Liu/Wen Xiong	N
1995	SC1837		Rao2005	Rao, DVS	English	2005	Peer-reviewed article	NA	Yes	Diverse/Unspecified	Diverse/Unspecified	Diverse/Unspecified	Diverse/Unspecified	Diverse/Unspecified	Diverse/Unspecified	Diverse/Unspecified	Viral, fungal and bacterial pathogens	aquatic	Asia	India		The East Coast Of India	Country	1994-1995	Period	1994	1995	1994	1995	One-time	100000000	NA	NA	1.6537e+08	717949766	50000000	8.2685e+07	358974883	USD	1994	Effective	Observed	Report/Estimation	Fishery	Damage-Loss	Damage_costs	no	Chunlong Liu/Wen Xiong	N
1998	SC1856		Rao2005	Rao, DVS	English	2005	Peer-reviewed article	NA	Yes	Diverse/Unspecified	Diverse/Unspecified	Diverse/Unspecified	Diverse/Unspecified	Diverse/Unspecified	Diverse/Unspecified	Diverse/Unspecified	Biofouling (Corrosion)	aquatic	Asia	India		India	Country	1998	Year	1998	1998	1998	1998	One-time	117000000	NA	NA	1.75936e+08	7.96198e+08	117000000	1.75936e+08	7.96198e+08	USD	1998	Publication year	Observed	Report/Estimation	Public and social welfare	Damage-Loss	Damage_costs	no	Chunlong Liu/Wen Xiong	N
2010	SC1859		4	Myrick S, Norton G W, Selvaraj K N, Natarajan K, Muniappan R	English	2013	Peer-reviewed article	NA	Yes	Animalia	Arthropoda	Insecta	Hemiptera	Pseudococcidae	Paracoccus	Paracoccus marginatus	papaya mealybug	terrestrial	Asia	India		Unspecified	Country	One-time	Period	2010	2014	2010	2014	One-time	121000000	NA	NA	1.36018e+08	4.38424e+08	24200000	2.72036e+07	8.76849e+07	USD	2010	Publication year	Observed	Report/Estimation	Agriculture/Environment/Health/Public and social welfare	Control	Management_costs	yes	Achyut Kumar	N
2011	SC1859		4	Myrick S, Norton G W, Selvaraj K N, Natarajan K, Muniappan R	English	2013	Peer-reviewed article	NA	Yes	Animalia	Arthropoda	Insecta	Hemiptera	Pseudococcidae	Paracoccus	Paracoccus marginatus	papaya mealybug	terrestrial	Asia	India		Unspecified	Country	One-time	Period	2010	2014	2010	2014	One-time	121000000	NA	NA	1.36018e+08	4.38424e+08	24200000	2.72036e+07	8.76849e+07	USD	2010	Publication year	Observed	Report/Estimation	Agriculture/Environment/Health/Public and social welfare	Control	Management_costs	yes	Achyut Kumar	N
2012	SC1859		4	Myrick S, Norton G W, Selvaraj K N, Natarajan K, Muniappan R	English	2013	Peer-reviewed article	NA	Yes	Animalia	Arthropoda	Insecta	Hemiptera	Pseudococcidae	Paracoccus	Paracoccus marginatus	papaya mealybug	terrestrial	Asia	India		Unspecified	Country	One-time	Period	2010	2014	2010	2014	One-time	121000000	NA	NA	1.36018e+08	4.38424e+08	24200000	2.72036e+07	8.76849e+07	USD	2010	Publication year	Observed	Report/Estimation	Agriculture/Environment/Health/Public and social welfare	Control	Management_costs	yes	Achyut Kumar	N
2013	SC1859		4	Myrick S, Norton G W, Selvaraj K N, Natarajan K, Muniappan R	English	2013	Peer-reviewed article	NA	Yes	Animalia	Arthropoda	Insecta	Hemiptera	Pseudococcidae	Paracoccus	Paracoccus marginatus	papaya mealybug	terrestrial	Asia	India		Unspecified	Country	One-time	Period	2010	2014	2010	2014	One-time	121000000	NA	NA	1.36018e+08	4.38424e+08	24200000	2.72036e+07	8.76849e+07	USD	2010	Publication year	Observed	Report/Estimation	Agriculture/Environment/Health/Public and social welfare	Control	Management_costs	yes	Achyut Kumar	N
2014	SC1859		4	Myrick S, Norton G W, Selvaraj K N, Natarajan K, Muniappan R	English	2013	Peer-reviewed article	NA	Yes	Animalia	Arthropoda	Insecta	Hemiptera	Pseudococcidae	Paracoccus	Paracoccus marginatus	papaya mealybug	terrestrial	Asia	India		Unspecified	Country	One-time	Period	2010	2014	2010	2014	One-time	121000000	NA	NA	1.36018e+08	4.38424e+08	24200000	2.72036e+07	8.76849e+07	USD	2010	Publication year	Observed	Report/Estimation	Agriculture/Environment/Health/Public and social welfare	Control	Management_costs	yes	Achyut Kumar	N
1988	SC2190		Rao2005	Rao, DVS	English	2005	Peer-reviewed article	NA	Yes	Diverse/Unspecified	Diverse/Unspecified	Diverse/Unspecified	Diverse/Unspecified	Diverse/Unspecified	Diverse/Unspecified	Diverse/Unspecified	Biodeterioration of wooden fishing craft	aquatic	Asia	India		India	Country	1998	Year	1988	1998	1988	1998	One-time	5500000	5000000	6000000	1.14001e+07	3.06879e+07	5500000	1.14001e+07	3.06879e+07	USD	1988	Publication year	Observed	Report/Estimation	Public and social welfare	Damage-Loss	Damage_costs	no	Chunlong Liu/Wen Xiong	N
1989	SC2190		Rao2005	Rao, DVS	English	2005	Peer-reviewed article	NA	Yes	Diverse/Unspecified	Diverse/Unspecified	Diverse/Unspecified	Diverse/Unspecified	Diverse/Unspecified	Diverse/Unspecified	Diverse/Unspecified	Biodeterioration of wooden fishing craft	aquatic	Asia	India		India	Country	1998	Year	1988	1998	1988	1998	One-time	5500000	5000000	6000000	1.14001e+07	3.06879e+07	5500000	1.14001e+07	3.06879e+07	USD	1988	Publication year	Observed	Report/Estimation	Public and social welfare	Damage-Loss	Damage_costs	no	Chunlong Liu/Wen Xiong	N
1990	SC2190		Rao2005	Rao, DVS	English	2005	Peer-reviewed article	NA	Yes	Diverse/Unspecified	Diverse/Unspecified	Diverse/Unspecified	Diverse/Unspecified	Diverse/Unspecified	Diverse/Unspecified	Diverse/Unspecified	Biodeterioration of wooden fishing craft	aquatic	Asia	India		India	Country	1998	Year	1988	1998	1988	1998	One-time	5500000	5000000	6000000	1.14001e+07	3.06879e+07	5500000	1.14001e+07	3.06879e+07	USD	1988	Publication year	Observed	Report/Estimation	Public and social welfare	Damage-Loss	Damage_costs	no	Chunlong Liu/Wen Xiong	N
1991	SC2190		Rao2005	Rao, DVS	English	2005	Peer-reviewed article	NA	Yes	Diverse/Unspecified	Diverse/Unspecified	Diverse/Unspecified	Diverse/Unspecified	Diverse/Unspecified	Diverse/Unspecified	Diverse/Unspecified	Biodeterioration of wooden fishing craft	aquatic	Asia	India		India	Country	1998	Year	1988	1998	1988	1998	One-time	5500000	5000000	6000000	1.14001e+07	3.06879e+07	5500000	1.14001e+07	3.06879e+07	USD	1988	Publication year	Observed	Report/Estimation	Public and social welfare	Damage-Loss	Damage_costs	no	Chunlong Liu/Wen Xiong	N
1992	SC2190		Rao2005	Rao, DVS	English	2005	Peer-reviewed article	NA	Yes	Diverse/Unspecified	Diverse/Unspecified	Diverse/Unspecified	Diverse/Unspecified	Diverse/Unspecified	Diverse/Unspecified	Diverse/Unspecified	Biodeterioration of wooden fishing craft	aquatic	Asia	India		India	Country	1998	Year	1988	1998	1988	1998	One-time	5500000	5000000	6000000	1.14001e+07	3.06879e+07	5500000	1.14001e+07	3.06879e+07	USD	1988	Publication year	Observed	Report/Estimation	Public and social welfare	Damage-Loss	Damage_costs	no	Chunlong Liu/Wen Xiong	N
1993	SC2190		Rao2005	Rao, DVS	English	2005	Peer-reviewed article	NA	Yes	Diverse/Unspecified	Diverse/Unspecified	Diverse/Unspecified	Diverse/Unspecified	Diverse/Unspecified	Diverse/Unspecified	Diverse/Unspecified	Biodeterioration of wooden fishing craft	aquatic	Asia	India		India	Country	1998	Year	1988	1998	1988	1998	One-time	5500000	5000000	6000000	1.14001e+07	3.06879e+07	5500000	1.14001e+07	3.06879e+07	USD	1988	Publication year	Observed	Report/Estimation	Public and social welfare	Damage-Loss	Damage_costs	no	Chunlong Liu/Wen Xiong	N
1994	SC2190		Rao2005	Rao, DVS	English	2005	Peer-reviewed article	NA	Yes	Diverse/Unspecified	Diverse/Unspecified	Diverse/Unspecified	Diverse/Unspecified	Diverse/Unspecified	Diverse/Unspecified	Diverse/Unspecified	Biodeterioration of wooden fishing craft	aquatic	Asia	India		India	Country	1998	Year	1988	1998	1988	1998	One-time	5500000	5000000	6000000	1.14001e+07	3.06879e+07	5500000	1.14001e+07	3.06879e+07	USD	1988	Publication year	Observed	Report/Estimation	Public and social welfare	Damage-Loss	Damage_costs	no	Chunlong Liu/Wen Xiong	N
1995	SC2190		Rao2005	Rao, DVS	English	2005	Peer-reviewed article	NA	Yes	Diverse/Unspecified	Diverse/Unspecified	Diverse/Unspecified	Diverse/Unspecified	Diverse/Unspecified	Diverse/Unspecified	Diverse/Unspecified	Biodeterioration of wooden fishing craft	aquatic	Asia	India		India	Country	1998	Year	1988	1998	1988	1998	One-time	5500000	5000000	6000000	1.14001e+07	3.06879e+07	5500000	1.14001e+07	3.06879e+07	USD	1988	Publication year	Observed	Report/Estimation	Public and social welfare	Damage-Loss	Damage_costs	no	Chunlong Liu/Wen Xiong	N
1996	SC2190		Rao2005	Rao, DVS	English	2005	Peer-reviewed article	NA	Yes	Diverse/Unspecified	Diverse/Unspecified	Diverse/Unspecified	Diverse/Unspecified	Diverse/Unspecified	Diverse/Unspecified	Diverse/Unspecified	Biodeterioration of wooden fishing craft	aquatic	Asia	India		India	Country	1998	Year	1988	1998	1988	1998	One-time	5500000	5000000	6000000	1.14001e+07	3.06879e+07	5500000	1.14001e+07	3.06879e+07	USD	1988	Publication year	Observed	Report/Estimation	Public and social welfare	Damage-Loss	Damage_costs	no	Chunlong Liu/Wen Xiong	N
1997	SC2190		Rao2005	Rao, DVS	English	2005	Peer-reviewed article	NA	Yes	Diverse/Unspecified	Diverse/Unspecified	Diverse/Unspecified	Diverse/Unspecified	Diverse/Unspecified	Diverse/Unspecified	Diverse/Unspecified	Biodeterioration of wooden fishing craft	aquatic	Asia	India		India	Country	1998	Year	1988	1998	1988	1998	One-time	5500000	5000000	6000000	1.14001e+07	3.06879e+07	5500000	1.14001e+07	3.06879e+07	USD	1988	Publication year	Observed	Report/Estimation	Public and social welfare	Damage-Loss	Damage_costs	no	Chunlong Liu/Wen Xiong	N
1998	SC2190		Rao2005	Rao, DVS	English	2005	Peer-reviewed article	NA	Yes	Diverse/Unspecified	Diverse/Unspecified	Diverse/Unspecified	Diverse/Unspecified	Diverse/Unspecified	Diverse/Unspecified	Diverse/Unspecified	Biodeterioration of wooden fishing craft	aquatic	Asia	India		India	Country	1998	Year	1988	1998	1988	1998	One-time	5500000	5000000	6000000	1.14001e+07	3.06879e+07	5500000	1.14001e+07	3.06879e+07	USD	1988	Publication year	Observed	Report/Estimation	Public and social welfare	Damage-Loss	Damage_costs	no	Chunlong Liu/Wen Xiong	N
2006	SC2260		Wise2007	Wise, R.M., van Wilgen, B.W., Hill, M.P., Schulthess, F., Tweddle, D., Chabi-Olay, A. and Zimmermann, H.G.	English	2007	Official report	NA	Yes	Plantae	Tracheophyta	Magnoliopsida	Asterales	Asteraceae	Parthenium	Parthenium hysterophorus	Parthenium weed	terrestrial	Asia	India		India	Site	2006	Period	2006	2006	2006	2006	One-time	28	14	42	34.0458	140.775	28	34.0458	140.775	USD	2006	Effective	Observed	Report/Estimation	Authorities-Stakeholders	Control	Management_costs	no	Desika Moodley	N
[truncated: 1 more columns]

## Sheet: Variables_Info
Column	Definition
Cost ID	Unique identifier for the cost entry
Repository	Literature engine from which the reference was found
Reference ID	Unique identifier for the publication where costs are reported. As much as possible this is the original source where the cost was first cited
Authors	The authors of the material analyzed
Publication year	Year where the publicacion was
Type of material	The type of material analyzed (i.e. scientific peer-reviewed article or grey literature); for grey literature, the exact nature of the material was indicated (e.g., official report, press release)
Previous materials	If any, the list of successive materials checked before reaching the material originally providing the cost estimate
Availability	The accessibility of the material as a searchable document (yes/no)
Kingdom	Taxonomic kingdom the invasive species belong
Phylum	Taxonomic phylum the invasive species belong
Class	Taxonomic class the invasive species belong
Order	Taxonomic order the invasive species belong
Family	Taxonomic family the invasive species belong
Genus	Taxonomic genus the invasive species belong
Species	Taxonomic species the invasive species belong
Common name	The non-scientific (or vernacular) name(s) provided by the authors, or by the International Union for Conservation of Nature (IUCN) when not provided
Environment_IAS	The type of habitat (aquatic, terrestrial, semi-aquatic) where the cost estimate occurred
Geographic region	The geographical region(s) where the cost estimate occurred (Africa, Asia, Central America, Europe, North America, Oceania, Pacific islands, South America)
Official country	The country or official territory where the cost is incurred; sometimes, this is not congruent with the geographic regions as some territories (e.g., overseas areas) are situated on continents other than their country of attachment
State.Province	name of the state, province, territory where the cost incurred.
Location	When provided, the precise location (e.g., region, city, area) where the cost estimate occurred
Spatial scale	Order of magnitude of the extent, size of the land/water area where the costs incurred. Options include: Global, continental,regional, country, site and unit
Period of estimation	If provided, the exact period of time covered by the costs estimated, otherwise the raw formulation (e.g. late 90s, during 5 years)
Time range	2 options: Period if the estimate is given for a period exceeding a year or; Year if the estimate is given yearly or for a period up to one year
Probable starting year & Probable ending year	The year range in which the cost is known or assumed to occur. When not explicitly provided by the authors, we mentioned ‘unspecified’ in both columns unless the authors provided a clear duration time. In this case, we considered the ‘Publication year’ as a reference for the probable starting/ending year from which we added/subtracted the number of years* of the ‘Period of estimation’. In the cas…
Occurrence	The status of the cost estimate as Potentially ongoing (if the cost can be expected to continue over time) or One-time (if the cost was explicitly considered as over by the authors)
Raw cost estimate local currency	The cost estimate directly retrieved from the analyzed materials
Raw cost estimate 2017 USD exchange rate	The ‘Raw cost estimate local currency’ standardised from local ‘Currency’ and ‘Applicable year’ to 2017 US$ based on ER**
Raw cost estimate 2017 USD PPP	The ‘Raw cost estimate local currency’ standardized to 2017 US$ based on PPP***
Cost estimate per year local currency	The ‘Raw cost estimate local currency’ transformed to a cost estimate per year of the ‘Period of estimation’ (obtained by dividing the raw cost estimate by the number of years* of the ‘Period of estimation’)
Cost estimate per year 2017 USD exchange rate	The ‘Cost estimate per year local currency’ standardized from local ‘Currency’ and ‘Applicable year’ to 2017 USD based on ER**
Cost estimate per year 2017 USD PPP	The ‘Cost estimate per year local currency’ standardized from local ‘Currency’ and ‘Applicable year’ to 2017 USD based on PPP***
Currency	The currency of the ‘Raw cost estimate local currency’ as extracted from the material
Applicable year	The year of the ‘Currency’ value (not the year of the cost occurrence) considered for the conversion/standardization of the cost estimate
Type of applicable year	The assessment of the applicable year as Effective if explicitly stated by the authors or Publication year if no explicit information provided
Implementation	This states — at the time of the estimation — whether the reported cost was actually Observed (i.e., cost actually incurred) or Potential (i.e., not incurred but expected cost)
Acquisition method	The method used to provide the cost estimate as a Report/estimation (gathered or derived from field-based information) or Extrapolation (cost modelled beyond the original spatial and/or temporal observation range)
Impacted sector	The sector impacted by the cost estimate in our socio-ecosystems: Agriculture (considered at its broadest sense, food and other useful products produced by human activities through using natural and/plant resources from their ecosystems such as crop growing, livestock breeding, beekeeping, land management); Authorities-Stakeholders (governmental services and/or official organisations such as cons…
Type of cost	damage and losses incurred by an invasion (e.g. damage repair, medical care, value of crop losses), or means dedicated to understand or predict (e.g., research), prevent (e.g., education, biosecurity), early detect (e.g., monitoring, surveillance) and/or manage (e.g., control, eradication) the invaders
Type of cost merged	Reassignment of the Type of Cost column to the following four categories: Damage (economic losses such as yield loss, health issues, infrastructure damage), Management (monetary resources allocated to mitigate the spread, such as prevention, control, research), Mixed (includes both 'damage' and 'management', Unspecified (when not clearly defined)
Method reliability	The assessment of the methodological approach used for cost estimation as of (i) high reliability if either provided by officially pre-assessed materials (peer-reviewed articles and official reports) or the estimation method was documented, repeatable and/or traceable if provided by other grey literature, or (ii) low reliability if not
Details	Details
Benefit values	Mention (if any) of the benefit value in the analyzed material (yes/no); the figure was not recorded or described as being out of the scope of InvaCost
Contributors	The name of collaborator(s) having recorded the cost estimate
Island	Yes/no if the place is an island
protectedArea	Yes/no if the place is an island
Language	Language of the publication
Impact_year	year of the study
Note: For more details on variables, see: Diagne C, Leroy B, Gozlan RE, Vaissière AC, Assailly C, et al (2020) InvaCost, a public database of the economic costs of biological invasions worldwide. Sci Data 7(1):1-12
