# Supplementary material for: Massive economic costs of biological invasions despite widespread knowledge gaps: a dual setback for India
Source: Springer Nature journal article supplement (doi:10.1007/s10530-022-02780-z), 2022-04-05

**Title: Fragmented yet high economic costs of biological invasions in India**

**Authors:** Alok Bang1,*, Ross N. Cuthbert2,3, Phillip J. Haubrock4,5, Romina D. Fernandez6, Desika Moodley7, Christophe Diagne8, Anna J. Turbelin8, David Renault9,10, Tatenda Dalu11, Franck Courchamp8

**Affiliations:**

1 Society for Ecology Evolution and Development, Wardha 442001, Maharashtra, India

2 GEOMAR Helmholtz-Zentrum für Ozeanforschung Kiel, 24105 Kiel, Germany

3 School of Biological Sciences, Queen’s University Belfast, BT9 5DL Belfast, United Kingdom

4 Senckenberg Research Institute and Natural History Museum Frankfurt, Department of River Ecology and Conservation, Gelnhausen, Germany

5 Faculty of Fisheries and Protection of Waters, South Bohemian Research Centre of Aquaculture and Biodiversity of Hydrocenoses, University of South Bohemia, Vodňany, Czech Republic

6 Instituto de Ecología Regional, CONICET-Universidad Nacional de Tucumán. CC 34, 4107, Yerba Buena, Tucumán, Argentina

7 Czech Academy of Sciences, Institute of Botany, Department of Invasion Ecology, CZ-252 43, Průhonice, Czech Republic

8 Université Paris-Saclay, CNRS, AgroParisTech, Ecologie Systématique Evolution, 91405, Orsay, France

9 University of Rennes, CNRS, ECOBIO [(Ecosystèmes, biodiversité, évolution)] - UMR 6553, F 35000 Rennes, France

10 Institut Universitaire de France, 1 rue Descartes, 75231 Paris Cedex 05, France

11 School of Biology and Environmental Sciences, University of Mpumalanga, Nelspruit 1200, South Africa

***Corresponding author:** E-mail: [alokbang@gmail.com](mailto:alokbang@gmail.com)

**Electronic supplementary material:**

**ESM_2:** Temporal trend of the total annual invasion costs recorded in India according to OLS regression (linear: light blue; quadratic: yellow); robust regression (linear: dark blue; quadratic: orange); generalized additive model [GAM] (green); multiple additive regression splines [MARS] (purple); quantile regressions (bottom to top: 0.1: grey, 0.5: light grey, 0.9: dark grey) for the period 1960–2020. Error bands on MARS models represent prediction intervals (i.e. the interval of cost that any individual year can have). Error bands on all other models represent 95% confidence intervals.


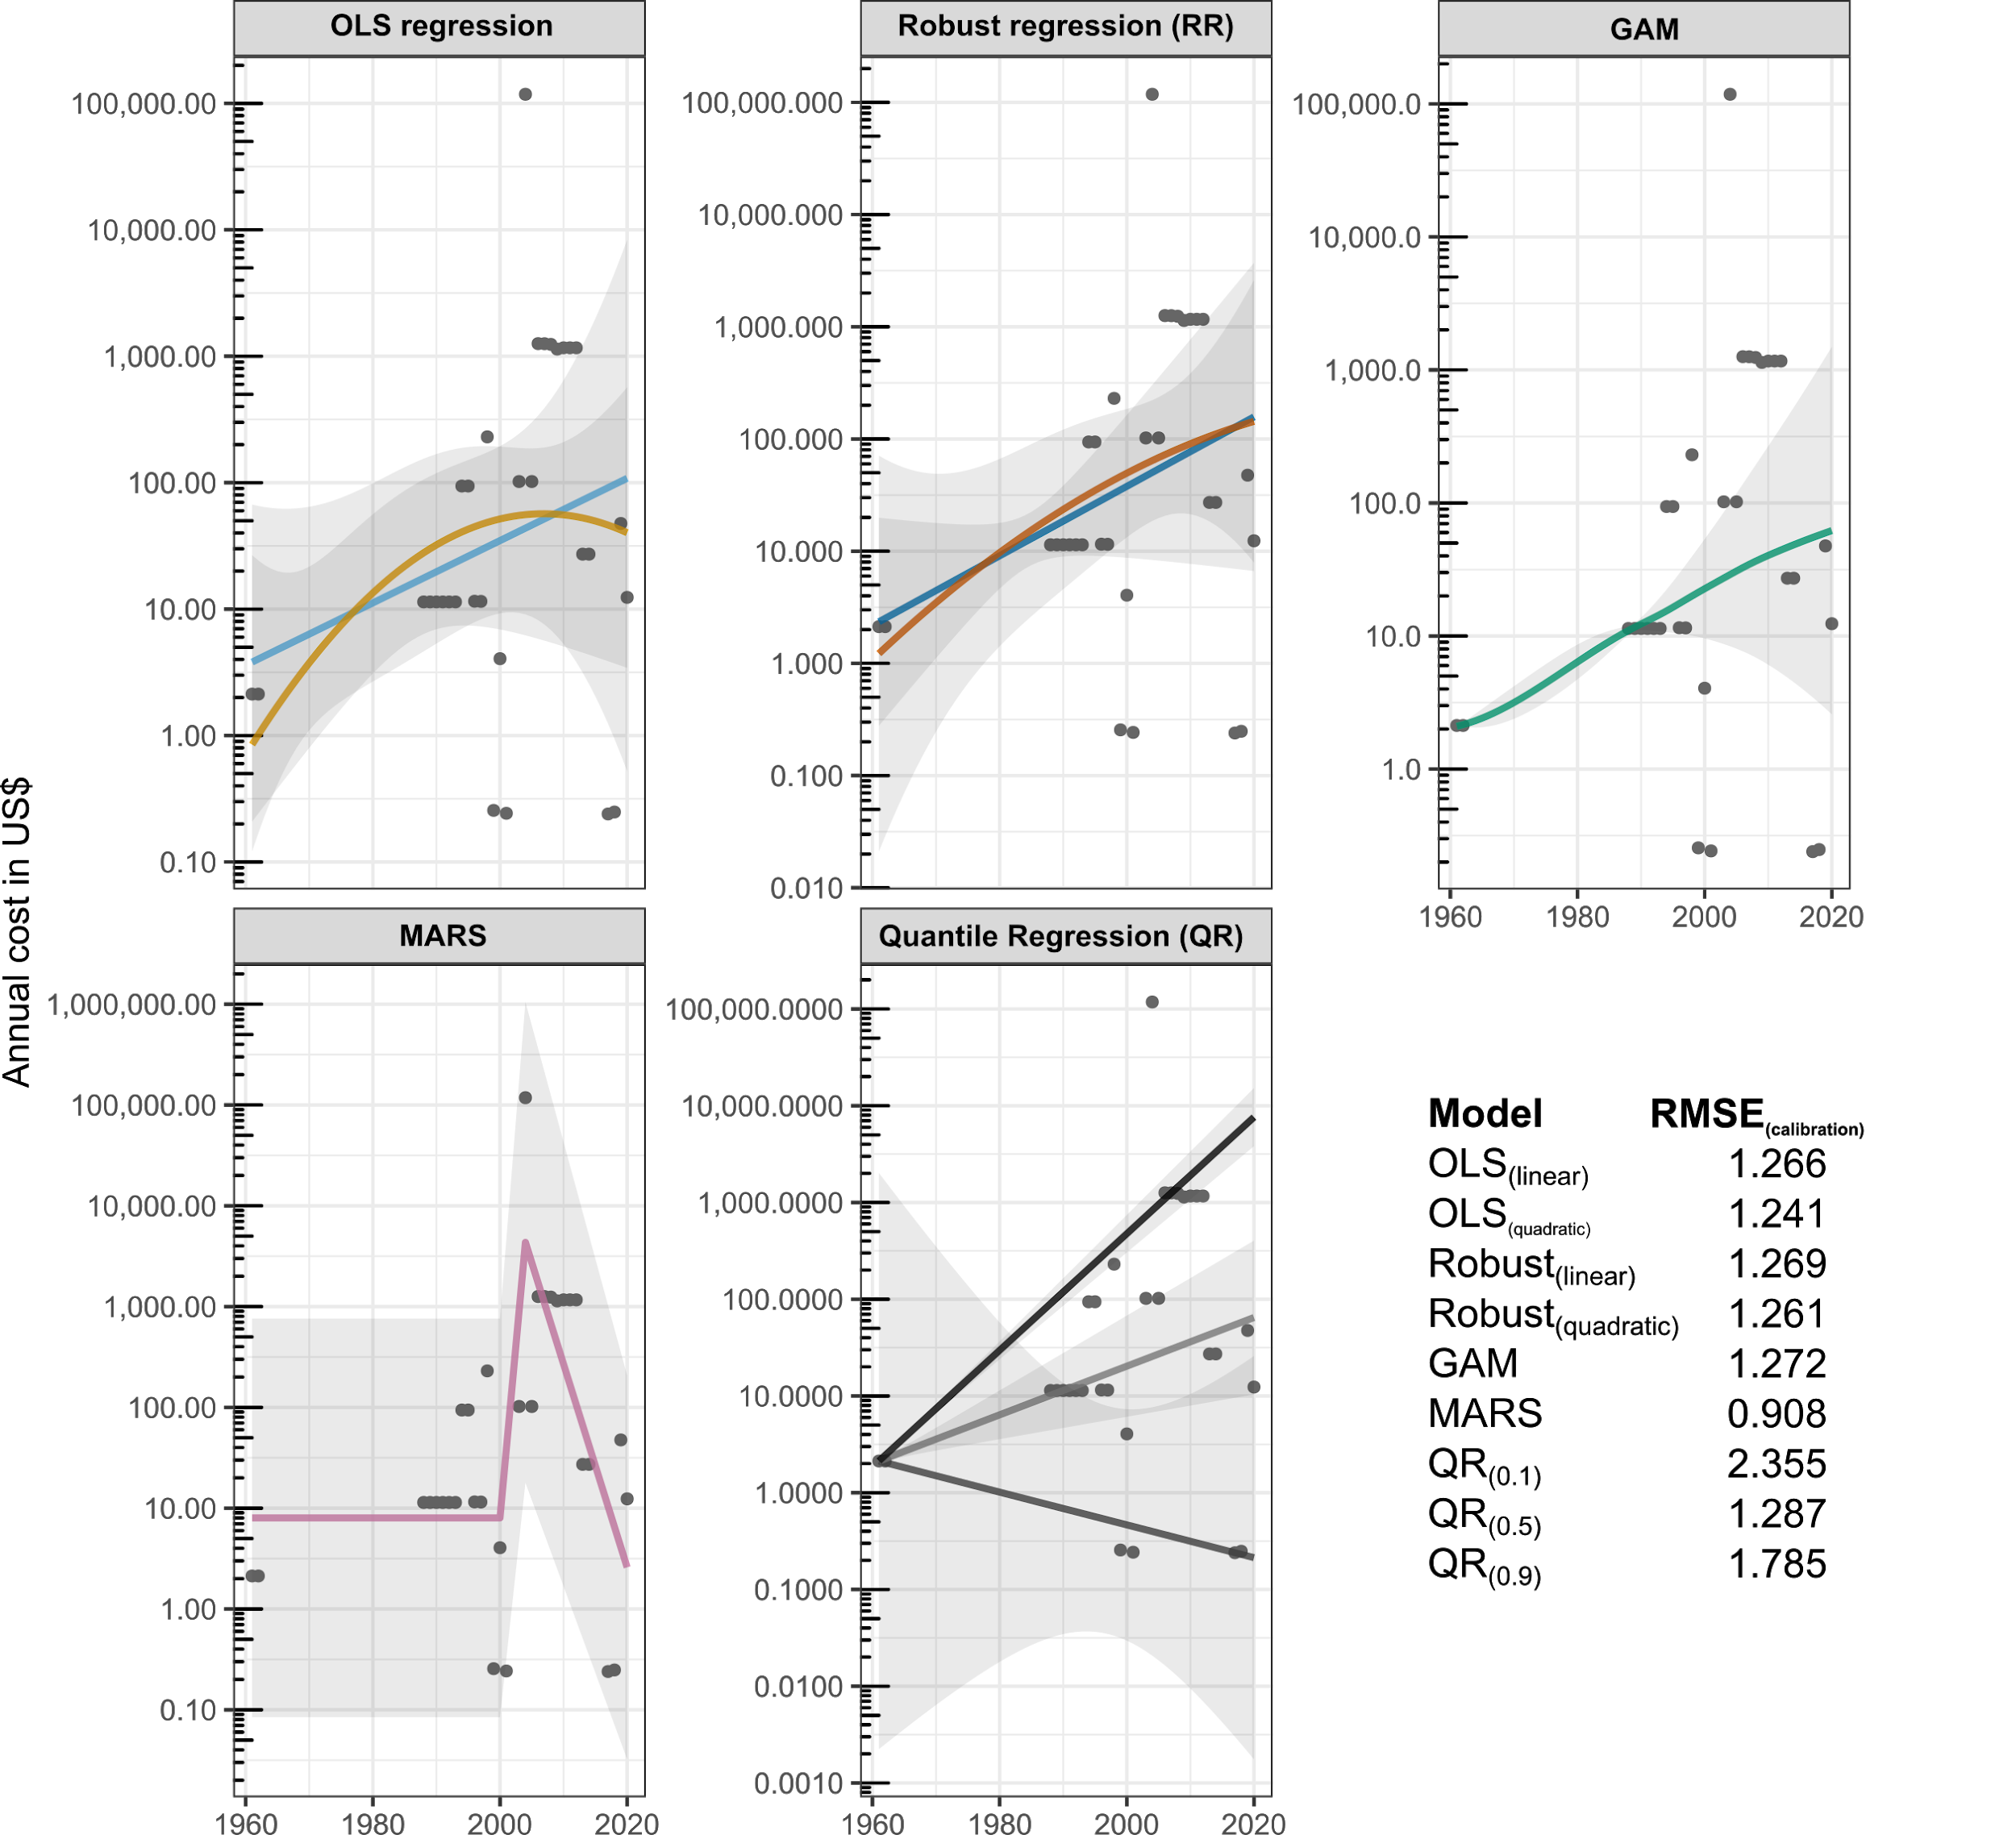

Supplement: MOESM2 [file 10530_2022_2780_MOESM2_ESM.docx]
